# Supplementary material for: A Network Analysis of Drug Combinations Associated with Acute Generalized Exanthematous Pustulosis (AGEP)
Source: MDPI journal article supplement (doi:10.3390/jcm10194486), 2021-09-29
Supplement: s1 [file s1]

## Supplementary Material

### Table of Contents

**Supplementary Text S1.** Observed to Expected ratio calculation.

**Supplementary Figure S1** Network overview of 2649 ICSRs that reported  $\geq 2$  drugs after applying the Louvain algorithm for cluster detection. In total, ten different clusters were identified. Nodes represent medications, the size of the nodes are proportional to the prevalence of the drug, the links indicate that the two connected drugs were taken concomitantly, the width of the link is proportional to the number of times the pair of drugs was reported. Only labels of nodes with a degree higher than 75 are shown.

**Supplementary Table S1.** Demographic characteristics of individual case safety reports with AGEP, stratified by age.

**Supplementary Table S2.** Summary of the top 20 drugs of each cluster found with the Louvain algorithm in the network analysis (N = 2649).

**Supplementary Table S3.** Summary of the top 20 drugs of each cluster found with the Louvain algorithm in the network analysis among **male** ICSRs (N = 1020).

**Supplementary Table S4.** Summary of the top 20 drugs of each cluster found with the Louvain algorithm in the network analysis among **female** ICSRs (N = 1571).

**Supplementary Table S5.** Summary of the top 20 drugs of each cluster found with the Louvain algorithm in the network analysis among ICSRs aged **< 65 years old** (N = 1379).

**Supplementary Table S6.** Summary of the top 20 drugs of each cluster found with the Louvain algorithm in the network analysis among ICSRs aged  **$\geq 65$  years old** (N = 1043).

**Supplementary Table S7.** Summary of the top 20 drugs of each cluster found by using the leading eigenvector clustering to the network analysis (N = 2649).

**Supplementary Text S1.** Observed to Expected ratio calculation.

Given a set of patients  $\mathcal{P} = \{p_1, \dots, p_N\}$  and a set of medications  $\mathcal{D} = \{d_1, \dots, d_M\}$ , each patient  $p_i \in \mathcal{P}$  is prescribed with a subset of medications  $D_i \subseteq \mathcal{D}$ . Therefore, our data is of the form  $\{p_i, D_i\}_{i=1}^N$ .

**Definition (Prevalence).** The prevalence of a drug  $d_m \in \mathcal{D}$  is defined as

$$P(d_m) = \frac{1}{N} \sum_{i=1}^N \mathbb{1}_{D_i}(d_m),$$

where  $\mathbb{1}$  is the *indicator function*  $\mathbb{1}_A(x) = \begin{cases} 1 & \text{if } x \in A \\ 0 & \text{if } x \notin A \end{cases}$ , indicating whether drug  $d_m$  is in the medications  $D_i$  of patient  $p_i$ .

The prevalence of a set of drugs  $\mathcal{X} \subseteq \mathcal{D}$  taken together is then

$$P(\mathcal{X}) = \frac{1}{N} \sum_{i=1}^N \prod_{d_m \in \mathcal{X}} \mathbb{1}_{D_i}(d_m)$$

**Definition (O/E ratio).** The Observed to Expected ratio (O/E ratio) of a set of drugs  $\mathcal{X} \subseteq \mathcal{D}$  is defined as the prevalence of the drugs in  $\mathcal{X}$  taken together divided by the product of the prevalence of the individual drugs in  $\mathcal{X}$ .

$$\text{O/E ratio}(\mathcal{X}) = \frac{P(\mathcal{X})}{\prod_{d_m \in \mathcal{X}} P(d_m)} = \frac{\sum_{i=1}^N \prod_{d_m \in \mathcal{X}} \mathbb{1}_{D_i}(d_m)}{\prod_{d_m \in \mathcal{X}} \sum_{i=1}^N \mathbb{1}_{D_i}(d_m)}$$

**Example (O/E ratio).**

| Drug 1      | Drug 2      | Observed Prevalence | Prevalence Drug 1 | Prevalence Drug 2 | Expected Prevalence           | O/E ratio                     |
|-------------|-------------|---------------------|-------------------|-------------------|-------------------------------|-------------------------------|
| paracetamol | amoxicillin | 4.11%               | 15.0%             | 21.6%             | $15.0\% \cdot 21.6\% = 3.2\%$ | $\frac{4.11\%}{3.2\%} = 1.28$ |

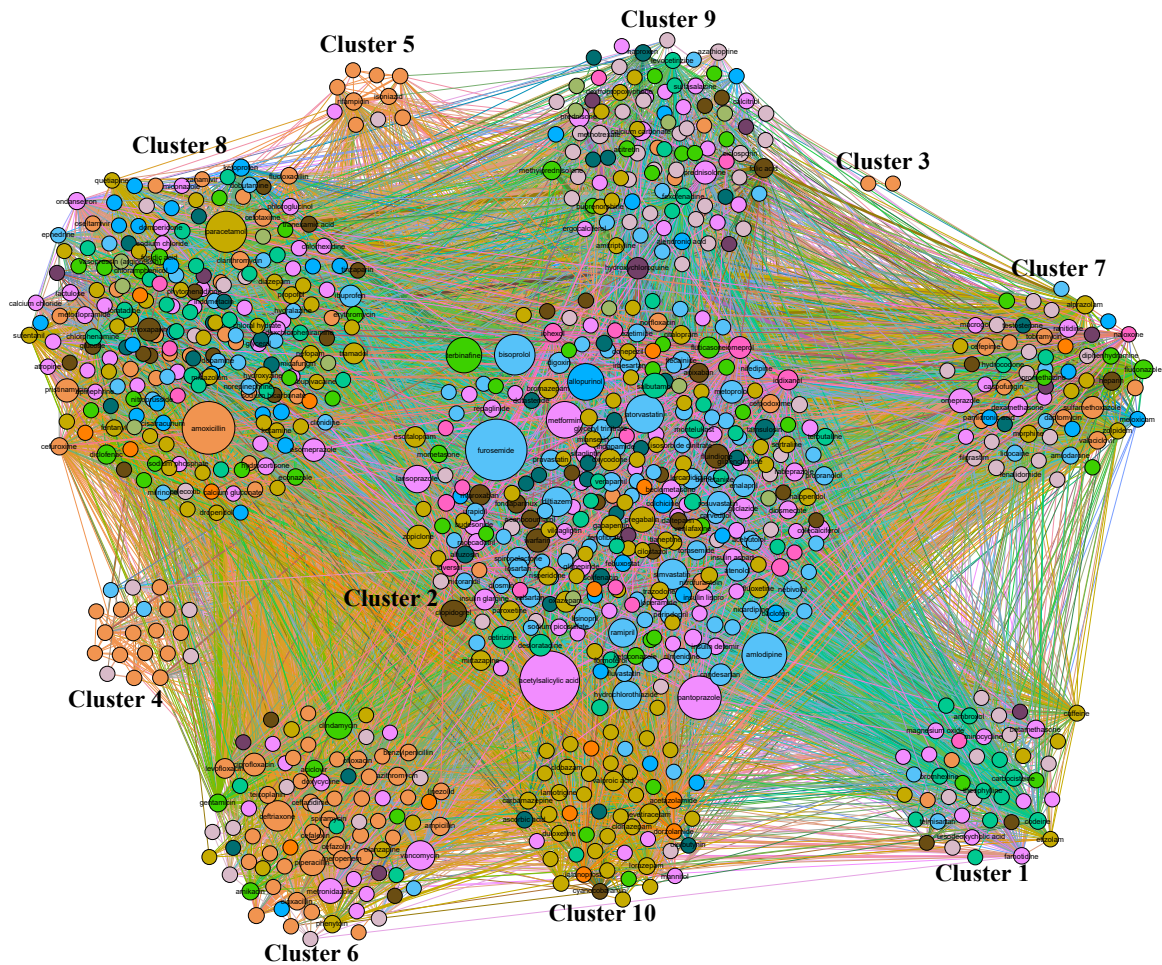

**Supplementary Figure S1** Network overview of 2649 ICSRs that reported  $\geq 2$  drugs after applying the Louvain algorithm for cluster detection. In total ten different clusters were identified. Nodes represent medications, the size of the nodes are proportional to the prevalence of the drug, the links indicate that the two connected drugs were taken concomitantly, the width of the link is proportional to the number of times the pair of drugs was reported. Only labels of nodes with a degree higher than 75 are shown.

**Supplementary Table S1.** Demographic characteristics of individual case safety reports with AGEp, stratified by age.

|                                 | <65<br>(n=1379) |             | ≥65<br>(n=1043) |             | Unknown<br>(n=227) |             | p-value |
|---------------------------------|-----------------|-------------|-----------------|-------------|--------------------|-------------|---------|
|                                 | N               | %           | N               | %           | N                  | %           |         |
| <b>Sex</b>                      |                 |             |                 |             |                    |             |         |
| Male                            | 602             | (43.8)      | 354             | (34.2)      | 64                 | (35.6)      | <0.001  |
| <b>Region of Report</b>         |                 |             |                 |             |                    |             | <0.001  |
| Europe                          | 727             | (52.7)      | 712             | (68.3)      | 146                | (64.3)      |         |
| Asia                            | 435             | (31.5)      | 161             | (15.4)      | 23                 | (10.1)      |         |
| Africa                          | 21              | (1.5)       | 2               | (0.2)       | 3                  | (1.3)       |         |
| North America                   | 164             | (11.9)      | 158             | (15.1)      | 52                 | (22.9)      |         |
| Oceania                         | 25              | (1.8)       | 8               | (0.8)       | 2                  | (0.9)       |         |
| South America                   | 7               | (0.5)       | 2               | (0.2)       | 1                  | (0.4)       |         |
| <b>Reporter Type</b>            |                 |             |                 |             |                    |             | 0.006   |
| Physician                       | 862             | (81.5)      | 729             | (86.2)      | 148                | (80.4)      |         |
| Other Health Professional       | 167             | (15.8)      | 103             | (12.2)      | 26                 | (14.1)      |         |
| Non Health Professional         | 29              | (2.7)       | 14              | (1.7)       | 10                 | (5.4)       |         |
| <b>Seriousness (Yes)</b>        | 1058            | (89.1)      | 920             | (94.7)      | 201                | (94.8)      | <0.001  |
| <b>Death</b>                    | 11              | (0.8)       | 43              | (4.1)       | 12                 | (5.3)       | <0.001  |
| <b>Number of reported Drugs</b> |                 |             |                 |             |                    |             |         |
| Mean (SD)                       | 3.68            | (2.65)      | 4.86            | (3.66)      | 4.53               | (3.80)      | <0.001  |
| Median (IQR)                    | 3.00            | [2.00,4.00] | 3.00            | [2.00,6.00] | 3.00               | [2.00,6.00] | <0.001  |

Abbreviations: SD, Standard Deviation; IQR, interquartile range.

P-values correspond to comparison between younger (aged <65 years) and older (≥65 years) ICSRs

**Supplementary Table S2.** Summary of the top 20 drugs based on the reported drug for each of the clusters identified with the Louvain algorithm in the network analysis (N=2649).

Cardiovascular drugs highlighted in grey.

| Cluster 1<br>(N <sub>drugs</sub> =44) |        |       |            | Cluster 2<br>(N <sub>drugs</sub> =283) |        |       |            | Cluster 3<br>(N <sub>drugs</sub> =2) |        |       |            |
|---------------------------------------|--------|-------|------------|----------------------------------------|--------|-------|------------|--------------------------------------|--------|-------|------------|
| Drug                                  | Degree | Count | Prevalence | Drug                                   | Degree | Count | Prevalence | Drug                                 | Degree | Count | Prevalence |
| betamethasone                         | 280    | 45    | 1.70%      | furosemide                             | 688    | 197   | 7.44%      | cefprozil                            | 2      | 1     | 0.04%      |
| codeine                               | 248    | 26    | 0.98%      | acetylsalicylic acid                   | 692    | 189   | 7.13%      | famciclovir                          | 2      | 1     | 0.04%      |
| carbocisteine                         | 196    | 23    | 0.87%      | amlodipine                             | 534    | 126   | 4.76%      |                                      |        |       |            |
| famotidine                            | 212    | 22    | 0.83%      | pantoprazole                           | 538    | 121   | 4.57%      |                                      |        |       |            |
| ambroxol                              | 180    | 17    | 0.64%      | bisoprolol                             | 466    | 108   | 4.08%      |                                      |        |       |            |
| caffeine                              | 154    | 16    | 0.60%      | atorvastatin                           | 498    | 99    | 3.74%      |                                      |        |       |            |
| magnesium oxide                       | 188    | 14    | 0.53%      | metformin                              | 464    | 92    | 3.47%      |                                      |        |       |            |
| bromhexine                            | 114    | 12    | 0.45%      | allopurinol                            | 450    | 92    | 3.47%      |                                      |        |       |            |
| minocycline                           | 78     | 11    | 0.42%      | terbinafine                            | 294    | 87    | 3.28%      |                                      |        |       |            |
| telmisartan                           | 104    | 9     | 0.34%      | simvastatin                            | 406    | 65    | 2.45%      |                                      |        |       |            |
| theophylline                          | 112    | 9     | 0.34%      | diltiazem                              | 306    | 62    | 2.34%      |                                      |        |       |            |
| ursodeoxycholic acid                  | 88     | 8     | 0.30%      | hydrochlorothiazide                    | 354    | 59    | 2.23%      |                                      |        |       |            |
| fluorouracil                          | 74     | 8     | 0.30%      | ramipril                               | 324    | 58    | 2.19%      |                                      |        |       |            |
| etizolam                              | 118    | 7     | 0.26%      | lansoprazole                           | 328    | 53    | 2.00%      |                                      |        |       |            |
| pemetrexed                            | 56     | 6     | 0.23%      | clopidogrel                            | 330    | 47    | 1.77%      |                                      |        |       |            |
| oxaliplatin                           | 34     | 6     | 0.23%      | pregabalin                             | 358    | 44    | 1.66%      |                                      |        |       |            |
| tipepidine                            | 38     | 5     | 0.19%      | salbutamol                             | 338    | 42    | 1.59%      |                                      |        |       |            |
| olopatadine                           | 48     | 4     | 0.15%      | fluindione                             | 208    | 38    | 1.43%      |                                      |        |       |            |
| tulobuterol                           | 46     | 4     | 0.15%      | zopiclone                              | 326    | 36    | 1.36%      |                                      |        |       |            |
| cetuximab                             | 16     | 3     | 0.11%      | warfarin                               | 248    | 35    | 1.32%      |                                      |        |       |            |

**Supplementary Table S2. (continued)** Summary of the top 20 drugs based on the reported drug for each of the clusters identified with the Louvain algorithm in the network analysis (N=2649).

Cardiovascular drugs highlighted in grey.

| Cluster 4<br>(N <sub>drugs</sub> =18) |        |       |            | Cluster 5<br>(N <sub>drugs</sub> =10) |        |       |            | Cluster 6<br>(N <sub>drugs</sub> =85) |        |       |            |
|---------------------------------------|--------|-------|------------|---------------------------------------|--------|-------|------------|---------------------------------------|--------|-------|------------|
| Drug                                  | Degree | Count | Prevalence | Drug                                  | Degree | Count | Prevalence | Drug                                  | Degree | Count | Prevalence |
| ritonavir                             | 72     | 10    | 0.38%      | rifampicin                            | 206    | 34    | 1.28%      | ceftriaxone                           | 472    | 234   | 8.83%      |
| darunavir                             | 68     | 9     | 0.34%      | isoniazid                             | 92     | 19    | 0.72%      | vancomycin                            | 392    | 219   | 8.27%      |
| emtricitabine                         | 32     | 7     | 0.26%      | pyrazinamide                          | 24     | 10    | 0.38%      | clindamycin                           | 468    | 181   | 6.83%      |
| lamivudine                            | 30     | 6     | 0.23%      | moxifloxacin                          | 70     | 9     | 0.34%      | piperacillin                          | 428    | 157   | 5.93%      |
| cisplatin                             | 50     | 6     | 0.23%      | ethambutol                            | 48     | 8     | 0.30%      | metronidazole                         | 448    | 150   | 5.66%      |
| etoposide                             | 58     | 4     | 0.15%      | streptomycin                          | 14     | 1     | 0.04%      | ciprofloxacin                         | 358    | 116   | 4.38%      |
| bleomycin                             | 18     | 4     | 0.15%      | cycloserine                           | 14     | 1     | 0.04%      | levofloxacin                          | 300    | 72    | 2.72%      |
| peginterferon alfa-2a                 | 6      | 4     | 0.15%      | protonamide                           | 4      | 1     | 0.04%      | cefazolin                             | 282    | 60    | 2.27%      |
| nevirapine                            | 6      | 3     | 0.11%      | ethionamide                           | 14     | 1     | 0.04%      | ampicillin                            | 170    | 53    | 2.00%      |
| efavirenz                             | 18     | 3     | 0.11%      | tegafur                               | 8      | 1     | 0.04%      | meropenem                             | 260    | 49    | 1.85%      |
| atazanavir                            | 16     | 2     | 0.08%      |                                       |        |       |            | azithromycin                          | 208    | 48    | 1.81%      |
| didanosine                            | 18     | 2     | 0.08%      |                                       |        |       |            | gentamicin                            | 264    | 42    | 1.59%      |
| stavudine                             | 12     | 2     | 0.08%      |                                       |        |       |            | cloxacillin                           | 162    | 40    | 1.51%      |
| nelfinavir                            | 8      | 1     | 0.04%      |                                       |        |       |            | ofloxacin                             | 216    | 40    | 1.51%      |
| abacavir                              | 6      | 1     | 0.04%      |                                       |        |       |            | phenytoin                             | 124    | 35    | 1.32%      |
| raltegravir                           | 12     | 1     | 0.04%      |                                       |        |       |            | amikacin                              | 180    | 34    | 1.28%      |
| nadolol                               | 6      | 1     | 0.04%      |                                       |        |       |            | aciclovir                             | 184    | 33    | 1.25%      |
| zofenopril                            | 20     | 1     | 0.04%      |                                       |        |       |            | doxycycline                           | 98     | 30    | 1.13%      |
|                                       |        |       |            |                                       |        |       |            | ceftazidime                           | 118    | 29    | 1.09%      |
|                                       |        |       |            |                                       |        |       |            | teicoplanin                           | 140    | 29    | 1.09%      |

**Supplementary Table S2. (continued)** Summary of the top 20 drugs based on the reported drug for each of the clusters identified with the Louvain algorithm in the network analysis (N=2649). Cardiovascular drugs highlighted in grey.

| Cluster 7<br>(N <sub>drugs</sub> =61) |        |       |            | Cluster 8<br>(N <sub>drugs</sub> =212) |        |       |            |
|---------------------------------------|--------|-------|------------|----------------------------------------|--------|-------|------------|
| Drug                                  | Degree | Count | Prevalence | Drug                                   | Degree | Count | Prevalence |
| omeprazole                            | 614    | 137   | 5.17%      | amoxicillin                            | 786    | 573   | 21.63%     |
| sulfamethoxazole                      | 422    | 106   | 4.00%      | paracetamol                            | 916    | 397   | 14.99%     |
| dexamethasone                         | 366    | 61    | 2.30%      | pristinamycin                          | 370    | 124   | 4.68%      |
| fluconazole                           | 308    | 58    | 2.19%      | enoxaparin                             | 484    | 118   | 4.45%      |
| ranitidine                            | 330    | 47    | 1.77%      | esomeprazole                           | 566    | 116   | 4.38%      |
| heparin                               | 412    | 47    | 1.77%      | ibuprofen                              | 324    | 102   | 3.85%      |
| alprazolam                            | 398    | 46    | 1.74%      | tramadol                               | 380    | 93    | 3.51%      |
| cefepime                              | 164    | 39    | 1.47%      | diclofenac                             | 296    | 64    | 2.42%      |
| valaciclovir                          | 176    | 38    | 1.43%      | clarithromycin                         | 228    | 45    | 1.70%      |
| amiodarone                            | 244    | 32    | 1.21%      | hydroxyzine                            | 256    | 36    | 1.36%      |
| morphine                              | 282    | 31    | 1.17%      | cefuroxime                             | 250    | 34    | 1.28%      |
| diphenhydramine                       | 234    | 22    | 0.83%      | nefopam                                | 252    | 34    | 1.28%      |
| daptomycin                            | 148    | 21    | 0.79%      | ketoprofen                             | 180    | 33    | 1.25%      |
| lidocaine                             | 226    | 20    | 0.76%      | ondansetron                            | 312    | 32    | 1.21%      |
| zolpidem                              | 248    | 18    | 0.68%      | cefotaxime                             | 216    | 32    | 1.21%      |
| phenoxymethylpenicillin               | 38     | 12    | 0.45%      | metoclopramide                         | 260    | 31    | 1.17%      |
| mupirocin                             | 22     | 12    | 0.45%      | hydrocortisone                         | 334    | 30    | 1.13%      |
| tobramycin                            | 188    | 11    | 0.42%      | propofol                               | 242    | 28    | 1.06%      |
| meloxicam                             | 100    | 11    | 0.42%      | flucloxacillin                         | 182    | 26    | 0.98%      |
| lenalidomide                          | 128    | 10    | 0.38%      | erythromycin                           | 136    | 25    | 0.94%      |

**Supplementary Table S2. (continued)** Summary of the top 20 drugs based on the reported drug for each of the clusters identified with the Louvain algorithm in the network analysis (N=2649). Cardiovascular drugs highlighted in grey.

| Cluster 9<br>(N <sub>drugs</sub> =97) |        |       |            | Cluster 10<br>(N <sub>drugs</sub> =51) |        |       |            |
|---------------------------------------|--------|-------|------------|----------------------------------------|--------|-------|------------|
| Drug                                  | Degree | Count | Prevalence | Drug                                   | Degree | Count | Prevalence |
| prednisolone                          | 432    | 120   | 4.53%      | levetiracetam                          | 270    | 71    | 2.68%      |
| hydroxychloroquine                    | 286    | 98    | 3.70%      | valproic acid                          | 254    | 67    | 2.53%      |
| prednisone                            | 356    | 76    | 2.87%      | lorazepam                              | 262    | 28    | 1.06%      |
| calcium carbonate                     | 472    | 62    | 2.34%      | carbamazepine                          | 136    | 26    | 0.98%      |
| folic acid                            | 404    | 61    | 2.30%      | ascorbic acid                          | 232    | 24    | 0.91%      |
| methylprednisolone                    | 264    | 51    | 1.93%      | acetazolamide                          | 164    | 22    | 0.83%      |
| methotrexate                          | 222    | 50    | 1.89%      | lamotrigine                            | 166    | 19    | 0.72%      |
| alendronic acid                       | 186    | 25    | 0.94%      | duloxetine                             | 144    | 16    | 0.60%      |
| azathioprine                          | 80     | 23    | 0.87%      | clonazepam                             | 120    | 13    | 0.49%      |
| naproxen                              | 120    | 23    | 0.87%      | bupropion                              | 58     | 13    | 0.49%      |
| ciclosporin                           | 128    | 17    | 0.64%      | cyanocobalamin                         | 138    | 11    | 0.42%      |
| fexofenadine                          | 156    | 17    | 0.64%      | aripiprazole                           | 64     | 11    | 0.42%      |
| levocetirizine                        | 140    | 15    | 0.57%      | oxybutynin                             | 100    | 7     | 0.26%      |
| acitretin                             | 114    | 14    | 0.53%      | phenobarbital                          | 36     | 7     | 0.26%      |
| amitriptyline                         | 134    | 14    | 0.53%      | dorzolamide                            | 84     | 7     | 0.26%      |
| sulfasalazine                         | 84     | 12    | 0.45%      | latanoprost                            | 96     | 7     | 0.26%      |
| calcitriol                            | 118    | 12    | 0.45%      | clobazam                               | 76     | 6     | 0.23%      |
| infliximab                            | 46     | 12    | 0.45%      | mannitol                               | 110    | 5     | 0.19%      |
| dextropropoxyphene                    | 94     | 12    | 0.45%      | glucosamine                            | 34     | 5     | 0.19%      |
| adalimumab                            | 52     | 9     | 0.34%      | tropatepine                            | 68     | 5     | 0.19%      |



**Supplementary Table S3.** Summary of the top 20 drugs of each cluster found with the Louvain algorithm in the network analysis among male ICSRs (N=1020).

| Cluster 1<br>(N <sub>drugs</sub> =193) |        |       |            | Cluster 2<br>(N <sub>drugs</sub> =26) |        |       |            | Cluster 3<br>(N <sub>drugs</sub> =104) |        |       |            |
|----------------------------------------|--------|-------|------------|---------------------------------------|--------|-------|------------|----------------------------------------|--------|-------|------------|
| Drug                                   | Degree | Count | Prevalence | Drug                                  | Degree | Count | Prevalence | Drug                                   | Degree | Count | Prevalence |
| acetylsalicylic acid                   | 422    | 79    | 7.75%      | carbocisteine                         | 96     | 12    | 1.18%      | amoxicillin                            | 482    | 213   | 20.88%     |
| furosemide                             | 366    | 68    | 6.67%      | ambroxol                              | 102    | 9     | 0.88%      | paracetamol                            | 568    | 167   | 16.37%     |
| amlodipine                             | 288    | 47    | 4.61%      | pemetrexed                            | 52     | 5     | 0.49%      | ibuprofen                              | 184    | 49    | 4.80%      |
| bisoprolol                             | 302    | 46    | 4.51%      | caffeine                              | 48     | 5     | 0.49%      | diclofenac                             | 140    | 29    | 2.84%      |
| allopurinol                            | 282    | 44    | 4.31%      | theophylline                          | 74     | 5     | 0.49%      | tramadol                               | 144    | 27    | 2.65%      |
| prednisolone                           | 244    | 41    | 4.02%      | cefotiam                              | 14     | 3     | 0.29%      | ampicillin                             | 80     | 23    | 2.25%      |
| atorvastatin                           | 272    | 41    | 4.02%      | etizolam                              | 70     | 3     | 0.29%      | cloxacillin                            | 82     | 21    | 2.06%      |
| pristinamycin                          | 174    | 40    | 3.92%      | bromhexine                            | 48     | 3     | 0.29%      | betamethasone                          | 102    | 17    | 1.67%      |
| pantoprazole                           | 266    | 38    | 3.73%      | tipepidine                            | 24     | 3     | 0.29%      | benzylpenicillin                       | 40     | 16    | 1.57%      |
| metformin                              | 208    | 30    | 2.94%      | cefmetazole                           | 12     | 2     | 0.20%      | chlorphenamine                         | 112    | 14    | 1.37%      |
| cefazolin                              | 100    | 25    | 2.45%      | telmisartan                           | 46     | 2     | 0.20%      | cetirizine                             | 108    | 10    | 0.98%      |
| ramipril                               | 172    | 25    | 2.45%      | fenspiride                            | 10     | 2     | 0.20%      | desloratadine                          | 112    | 10    | 0.98%      |
| terbinafine                            | 106    | 24    | 2.35%      | palonosetron                          | 34     | 1     | 0.10%      | domperidone                            | 70     | 9     | 0.88%      |
| levofloxacin                           | 160    | 23    | 2.25%      | potassium citrate                     | 34     | 1     | 0.10%      | celecoxib                              | 38     | 8     | 0.78%      |
| simvastatin                            | 224    | 23    | 2.25%      | cefozopran                            | 4      | 1     | 0.10%      | cefixime                               | 18     | 7     | 0.69%      |
| diltiazem                              | 130    | 22    | 2.16%      | sitafloracin                          | 8      | 1     | 0.10%      | fusidic acid                           | 50     | 7     | 0.69%      |
| folic acid                             | 170    | 19    | 1.86%      | gefitinib                             | 34     | 1     | 0.10%      | naproxen                               | 36     | 7     | 0.69%      |
| lansoprazole                           | 146    | 18    | 1.76%      | ticlopidine                           | 6      | 1     | 0.10%      | ketoprofen                             | 32     | 7     | 0.69%      |
| rosuvastatin                           | 112    | 16    | 1.57%      | beraprost                             | 10     | 1     | 0.10%      | mefenamic acid                         | 26     | 7     | 0.69%      |
| iomeprol                               | 82     | 15    | 1.47%      | carbazochrome                         | 34     | 1     | 0.10%      | phloroglucinol                         | 56     | 6     | 0.59%      |

**Supplementary Table S3. (continued)** Summary of the top 20 drugs of each cluster found with the Louvain algorithm in the network analysis among male ICSRs (N=1020).

| Cluster 4<br>(N <sub>drugs</sub> =2) |        |       |            | Cluster 5<br>(N <sub>drugs</sub> =111) |        |       |            | Cluster 6<br>(N <sub>drugs</sub> =11) |        |       |            |
|--------------------------------------|--------|-------|------------|----------------------------------------|--------|-------|------------|---------------------------------------|--------|-------|------------|
| Drug                                 | Degree | Count | Prevalence | Drug                                   | Degree | Count | Prevalence | Drug                                  | Degree | Count | Prevalence |
| flomoxef                             | 2      | 1     | 0.10%      | vancomycin                             | 268    | 87    | 8.53%      | rifampicin                            | 160    | 17    | 1.67%      |
| cefcapene                            | 2      | 1     | 0.10%      | omeprazole                             | 376    | 59    | 5.78%      | methotrexate                          | 74     | 17    | 1.67%      |
|                                      |        |       |            | clindamycin                            | 212    | 58    | 5.69%      | isoniazid                             | 34     | 9     | 0.88%      |
|                                      |        |       |            | enoxaparin                             | 276    | 45    | 4.41%      | infliximab                            | 14     | 7     | 0.69%      |
|                                      |        |       |            | esomeprazole                           | 308    | 35    | 3.43%      | pyrazinamide                          | 8      | 4     | 0.39%      |
|                                      |        |       |            | dexamethasone                          | 244    | 32    | 3.14%      | ethambutol                            | 6      | 2     | 0.20%      |
|                                      |        |       |            | ranitidine                             | 240    | 25    | 2.45%      | ustekinumab                           | 6      | 2     | 0.20%      |
|                                      |        |       |            | fluconazole                            | 210    | 23    | 2.25%      | dalbavancin                           | 2      | 1     | 0.10%      |
|                                      |        |       |            | gentamicin                             | 210    | 22    | 2.16%      | apremilast                            | 4      | 1     | 0.10%      |
|                                      |        |       |            | meropenem                              | 222    | 21    | 2.06%      | permethrin                            | 4      | 1     | 0.10%      |
|                                      |        |       |            | ondansetron                            | 226    | 18    | 1.76%      | acitretin                             | 6      | 1     | 0.10%      |
|                                      |        |       |            | cefotaxime                             | 140    | 17    | 1.67%      |                                       |        |       |            |
|                                      |        |       |            | cefepime                               | 126    | 17    | 1.67%      |                                       |        |       |            |
|                                      |        |       |            | heparin                                | 232    | 17    | 1.67%      |                                       |        |       |            |
|                                      |        |       |            | amikacin                               | 96     | 17    | 1.67%      |                                       |        |       |            |
|                                      |        |       |            | doxycycline                            | 26     | 16    | 1.57%      |                                       |        |       |            |
|                                      |        |       |            | flucloxacillin                         | 140    | 16    | 1.57%      |                                       |        |       |            |
|                                      |        |       |            | cefuroxime                             | 148    | 15    | 1.47%      |                                       |        |       |            |
|                                      |        |       |            | amiodarone                             | 134    | 15    | 1.47%      |                                       |        |       |            |
|                                      |        |       |            | hydrocortisone                         | 238    | 14    | 1.37%      |                                       |        |       |            |

**Supplementary Table S3. (continued)** Summary of the top 20 drugs of each cluster found with the Louvain algorithm in the network analysis among male ICSRs (N=1020).

| Cluster 7<br>(N <sub>drugs</sub> =2) |        |       |            |       | Cluster 8<br>(N <sub>drugs</sub> =82) |        |       |            |  |
|--------------------------------------|--------|-------|------------|-------|---------------------------------------|--------|-------|------------|--|
| Drug                                 | Degree | Count | Prevalence |       | Drug                                  | Degree | Count | Prevalence |  |
| cefprozil                            |        | 2     | 1          | 0.10% | methyprednisolone                     | 168    | 24    | 2.35%      |  |
| famciclovir                          |        | 2     | 1          | 0.10% | prednisone                            | 100    | 22    | 2.16%      |  |
|                                      |        |       |            |       | tamsulosin                            | 216    | 19    | 1.86%      |  |
|                                      |        |       |            |       | hydroxychloroquine                    | 98     | 17    | 1.67%      |  |
|                                      |        |       |            |       | calcium carbonate                     | 192    | 14    | 1.37%      |  |
|                                      |        |       |            |       | azathioprine                          | 36     | 11    | 1.08%      |  |
|                                      |        |       |            |       | glucose                               | 80     | 9     | 0.88%      |  |
|                                      |        |       |            |       | famotidine                            | 118    | 8     | 0.78%      |  |
|                                      |        |       |            |       | ritonavir                             | 64     | 8     | 0.78%      |  |
|                                      |        |       |            |       | hydroxyzine                           | 58     | 8     | 0.78%      |  |
|                                      |        |       |            |       | itraconazole                          | 38     | 7     | 0.69%      |  |
|                                      |        |       |            |       | darunavir                             | 58     | 7     | 0.69%      |  |
|                                      |        |       |            |       | magnesium oxide                       | 90     | 6     | 0.59%      |  |
|                                      |        |       |            |       | emtricitabine                         | 26     | 6     | 0.59%      |  |
|                                      |        |       |            |       | cisplatin                             | 50     | 6     | 0.59%      |  |
|                                      |        |       |            |       | nifedipine                            | 58     | 6     | 0.59%      |  |
|                                      |        |       |            |       | dutasteride                           | 80     | 5     | 0.49%      |  |
|                                      |        |       |            |       | mirtazapine                           | 66     | 5     | 0.49%      |  |
|                                      |        |       |            |       | trimebutine                           | 34     | 4     | 0.39%      |  |
|                                      |        |       |            |       | fluorouracil                          | 42     | 4     | 0.39%      |  |

**Supplementary Table S3. (continued)** Summary of the top 20 drugs of each cluster found with the Louvain algorithm in the network analysis among male ICSRs (N=1020).

| Cluster 9<br>(N <sub>drugs</sub> =74) |        |       |            | Cluster 10<br>(N <sub>drugs</sub> =3) |        |       |            |
|---------------------------------------|--------|-------|------------|---------------------------------------|--------|-------|------------|
| Drug                                  | Degree | Count | Prevalence | Drug                                  | Degree | Count | Prevalence |
| ceftriaxone                           | 292    | 83    | 8.14%      | ivermectin                            | 4      | 1     | 0.10%      |
| piperacillin                          | 312    | 70    | 6.86%      | benzyl benzoate                       | 4      | 1     | 0.10%      |
| sulfamethoxazole                      | 264    | 57    | 5.59%      | darbepoetin alfa                      | 4      | 1     | 0.10%      |
| metronidazole                         | 284    | 56    | 5.49%      |                                       |        |       |            |
| ciprofloxacin                         | 224    | 48    | 4.71%      |                                       |        |       |            |
| azithromycin                          | 100    | 23    | 2.25%      |                                       |        |       |            |
| phenytoin                             | 70     | 21    | 2.06%      |                                       |        |       |            |
| valaciclovir                          | 78     | 17    | 1.67%      |                                       |        |       |            |
| aciclovir                             | 106    | 17    | 1.67%      |                                       |        |       |            |
| ofloxacin                             | 102    | 16    | 1.57%      |                                       |        |       |            |
| levetiracetam                         | 154    | 16    | 1.57%      |                                       |        |       |            |
| valproic acid                         | 136    | 15    | 1.47%      |                                       |        |       |            |
| carbamazepine                         | 64     | 13    | 1.27%      |                                       |        |       |            |
| mupirocin                             | 22     | 11    | 1.08%      |                                       |        |       |            |
| spiramycin                            | 56     | 10    | 0.98%      |                                       |        |       |            |
| phenoxymethylpenicillin               | 32     | 9     | 0.88%      |                                       |        |       |            |
| tazobactam                            | 42     | 8     | 0.78%      |                                       |        |       |            |
| lamotrigine                           | 118    | 8     | 0.78%      |                                       |        |       |            |
| lorazepam                             | 42     | 7     | 0.69%      |                                       |        |       |            |
| temozolomide                          | 12     | 6     | 0.59%      |                                       |        |       |            |

**Supplementary Table S4.** Summary of the top 20 drugs of each cluster found with the Louvain algorithm in the network analysis among female ICSRs (N=1571).

| Cluster 1<br>(N <sub>drugs</sub> =157) |        |       |            | Cluster 2<br>(N <sub>drugs</sub> =86) |        |       |            | Cluster 3<br>(N <sub>drugs</sub> =10) |        |       |            |
|----------------------------------------|--------|-------|------------|---------------------------------------|--------|-------|------------|---------------------------------------|--------|-------|------------|
| Drug                                   | Degree | Count | Prevalence | Drug                                  | Degree | Count | Prevalence | Drug                                  | Degree | Count | Prevalence |
| amoxicillin                            | 628    | 354   | 22.53%     | ceftriaxone                           | 336    | 142   | 9.04%      | rifampicin                            | 72     | 17    | 1.08%      |
| furosemide                             | 580    | 127   | 8.08%      | vancomycin                            | 284    | 118   | 7.51%      | isoniazid                             | 70     | 10    | 0.64%      |
| pantoprazole                           | 458    | 81    | 5.16%      | clindamycin                           | 358    | 113   | 7.19%      | moxifloxacin                          | 58     | 8     | 0.51%      |
| bisoprolol                             | 316    | 62    | 3.95%      | metronidazole                         | 294    | 92    | 5.86%      | pyrazinamide                          | 22     | 6     | 0.38%      |
| allopurinol                            | 284    | 46    | 2.93%      | piperacillin                          | 250    | 83    | 5.28%      | ethambutol                            | 48     | 6     | 0.38%      |
| clarithromycin                         | 126    | 35    | 2.23%      | ciprofloxacin                         | 194    | 64    | 4.07%      | streptomycin                          | 14     | 1     | 0.06%      |
| salbutamol                             | 308    | 33    | 2.10%      | sulfamethoxazole                      | 246    | 46    | 2.93%      | cycloserine                           | 14     | 1     | 0.06%      |
| betamethasone                          | 220    | 28    | 1.78%      | levofloxacin                          | 202    | 46    | 2.93%      | protionamide                          | 4      | 1     | 0.06%      |
| fluindione                             | 176    | 27    | 1.72%      | fluconazole                           | 198    | 32    | 2.04%      | ethionamide                           | 14     | 1     | 0.06%      |
| azithromycin                           | 142    | 25    | 1.59%      | ampicillin                            | 120    | 30    | 1.91%      | tegafur                               | 8      | 1     | 0.06%      |
| spironolactone                         | 220    | 24    | 1.53%      | meropenem                             | 122    | 27    | 1.72%      |                                       |        |       |            |
| warfarin                               | 166    | 21    | 1.34%      | ranitidine                            | 202    | 21    | 1.34%      |                                       |        |       |            |
| candesartan                            | 180    | 21    | 1.34%      | valaciclovir                          | 128    | 21    | 1.34%      |                                       |        |       |            |
| cetirizine                             | 208    | 19    | 1.21%      | cefepime                              | 110    | 20    | 1.27%      |                                       |        |       |            |
| fluticasone                            | 216    | 18    | 1.15%      | gentamicin                            | 106    | 20    | 1.27%      |                                       |        |       |            |
| oxazepam                               | 228    | 18    | 1.15%      | cloxacillin                           | 98     | 19    | 1.21%      |                                       |        |       |            |
| digoxin                                | 124    | 17    | 1.08%      | teicoplanin                           | 66     | 17    | 1.08%      |                                       |        |       |            |
| bromazepam                             | 208    | 17    | 1.08%      | amikacin                              | 124    | 17    | 1.08%      |                                       |        |       |            |
| budesonide                             | 182    | 16    | 1.02%      | amiodarone                            | 168    | 16    | 1.02%      |                                       |        |       |            |
| irbesartan                             | 166    | 16    | 1.02%      | aciclovir                             | 102    | 16    | 1.02%      |                                       |        |       |            |

**Supplementary Table S4.(continued)** Summary of the top 20 drugs of each cluster found with the Louvain algorithm in the network analysis among female ICSRs (N=1571).

| Cluster 4<br>(N <sub>drugs</sub> =1) |        |       |            | Cluster 5<br>(N <sub>drugs</sub> =144) |        |       |            | Cluster 6<br>(N <sub>drugs</sub> =2) |        |       |            |
|--------------------------------------|--------|-------|------------|----------------------------------------|--------|-------|------------|--------------------------------------|--------|-------|------------|
| Drug                                 | Degree | Count | Prevalence | Drug                                   | Degree | Count | Prevalence | Drug                                 | Degree | Count | Prevalence |
| peginterferon alfa-2a                | 4      | 1     | 0.06%      | acetylsalicylic acid                   | 528    | 108   | 6.87%      | anakinra                             | 2      | 1     | 0.06%      |
|                                      |        |       |            | amlodipine                             | 404    | 75    | 4.77%      | canakinumab                          | 2      | 1     | 0.06%      |
|                                      |        |       |            | omeprazole                             | 436    | 72    | 4.58%      |                                      |        |       |            |
|                                      |        |       |            | terbinafine                            | 242    | 63    | 4.01%      |                                      |        |       |            |
|                                      |        |       |            | metformin                              | 384    | 62    | 3.95%      |                                      |        |       |            |
|                                      |        |       |            | atorvastatin                           | 390    | 56    | 3.56%      |                                      |        |       |            |
|                                      |        |       |            | hydrochlorothiazide                    | 300    | 46    | 2.93%      |                                      |        |       |            |
|                                      |        |       |            | simvastatin                            | 274    | 41    | 2.61%      |                                      |        |       |            |
|                                      |        |       |            | folic acid                             | 316    | 40    | 2.55%      |                                      |        |       |            |
|                                      |        |       |            | diltiazem                              | 244    | 40    | 2.55%      |                                      |        |       |            |
|                                      |        |       |            | alprazolam                             | 340    | 36    | 2.29%      |                                      |        |       |            |
|                                      |        |       |            | ramipril                               | 238    | 33    | 2.10%      |                                      |        |       |            |
|                                      |        |       |            | clopidogrel                            | 232    | 32    | 2.04%      |                                      |        |       |            |
|                                      |        |       |            | pregabalin                             | 288    | 31    | 1.97%      |                                      |        |       |            |
|                                      |        |       |            | heparin                                | 294    | 30    | 1.91%      |                                      |        |       |            |
|                                      |        |       |            | zopiclone                              | 270    | 29    | 1.85%      |                                      |        |       |            |
|                                      |        |       |            | enalapril                              | 144    | 23    | 1.46%      |                                      |        |       |            |
|                                      |        |       |            | colecalfiferol                         | 248    | 21    | 1.34%      |                                      |        |       |            |
|                                      |        |       |            | lorazepam                              | 226    | 20    | 1.27%      |                                      |        |       |            |
|                                      |        |       |            | metoprolol                             | 216    | 18    | 1.15%      |                                      |        |       |            |

**Supplementary Table S4.(continued)** Summary of the top 20 drugs of each cluster found with the Louvain algorithm in the network analysis among female ICSRs (N=1571).

| Cluster 7<br>(N <sub>drugs</sub> =130) |        |       |            | Cluster 8<br>(N <sub>drugs</sub> =33) |        |       |            |
|----------------------------------------|--------|-------|------------|---------------------------------------|--------|-------|------------|
| Drug                                   | Degree | Count | Prevalence | Drug                                  | Degree | Count | Prevalence |
| paracetamol                            | 736    | 220   | 14.00%     | levetiracetam                         | 168    | 52    | 3.31%      |
| pristinamycin                          | 272    | 82    | 5.22%      | valproic acid                         | 154    | 48    | 3.06%      |
| esomeprazole                           | 416    | 80    | 5.09%      | atenolol                              | 176    | 21    | 1.34%      |
| enoxaparin                             | 376    | 72    | 4.58%      | alendronic acid                       | 156    | 19    | 1.21%      |
| tramadol                               | 314    | 62    | 3.95%      | phenytoin                             | 44     | 12    | 0.76%      |
| ibuprofen                              | 194    | 50    | 3.18%      | fexofenadine                          | 90     | 10    | 0.64%      |
| diclofenac                             | 216    | 34    | 2.16%      | dextropropoxyphene                    | 86     | 8     | 0.51%      |
| cefazolin                              | 238    | 31    | 1.97%      | clonazepam                            | 98     | 8     | 0.51%      |
| nefopam                                | 240    | 28    | 1.78%      | thiamazole                            | 34     | 6     | 0.38%      |
| hydroxyzine                            | 222    | 28    | 1.78%      | pioglitazone                          | 30     | 4     | 0.25%      |
| ketoprofen                             | 166    | 26    | 1.65%      | clobazam                              | 50     | 4     | 0.25%      |
| metoclopramide                         | 180    | 19    | 1.21%      | lamivudine                            | 24     | 3     | 0.19%      |
| phloroglucinol                         | 136    | 18    | 1.15%      | vemurafenib                           | 24     | 3     | 0.19%      |
| oxycodone                              | 198    | 18    | 1.15%      | phenobarbital                         | 24     | 3     | 0.19%      |
| morphine                               | 198    | 17    | 1.08%      | ritonavir                             | 20     | 2     | 0.13%      |
| propofol                               | 136    | 15    | 0.95%      | darunavir                             | 20     | 2     | 0.13%      |
| iomeprol                               | 96     | 15    | 0.95%      | diflucortolone                        | 14     | 2     | 0.13%      |
| fenofibrate                            | 126    | 14    | 0.89%      | carbimazole                           | 22     | 2     | 0.13%      |
| iodixanol                              | 92     | 14    | 0.89%      | oxygen                                | 18     | 2     | 0.13%      |
| ondansetron                            | 154    | 13    | 0.83%      | nateglinide                           | 8      | 1     | 0.06%      |

**Supplementary Table S4.(continued)** Summary of the top 20 drugs of each cluster found with the Louvain algorithm in the network analysis among female ICSRs (N=1571).

| Cluster 9<br>(N <sub>drugs</sub> =92) |        |       |            |  | Cluster 10<br>(N <sub>drugs</sub> =86) |        |       |            |  |
|---------------------------------------|--------|-------|------------|--|----------------------------------------|--------|-------|------------|--|
| Drug                                  | Degree | Count | Prevalence |  | Drug                                   | Degree | Count | Prevalence |  |
| hydroxychloroquine                    | 248    | 81    | 5.16%      |  | dexamethasone                          | 238    | 28    | 1.78%      |  |
| prednisolone                          | 280    | 77    | 4.90%      |  | ofloxacin                              | 150    | 24    | 1.53%      |  |
| prednisone                            | 310    | 53    | 3.37%      |  | desloratadine                          | 234    | 19    | 1.21%      |  |
| calcium carbonate                     | 362    | 46    | 2.93%      |  | acetazolamide                          | 150    | 19    | 1.21%      |  |
| lansoprazole                          | 254    | 35    | 2.23%      |  | rosuvastatin                           | 198    | 18    | 1.15%      |  |
| methotrexate                          | 188    | 33    | 2.10%      |  | cefuroxime                             | 98     | 16    | 1.02%      |  |
| methylprednisolone                    | 136    | 27    | 1.72%      |  | cefalexin                              | 102    | 15    | 0.95%      |  |
| hydrocortisone                        | 150    | 15    | 0.95%      |  | ascorbic acid                          | 130    | 15    | 0.95%      |  |
| acitretin                             | 110    | 13    | 0.83%      |  | fluoxetine                             | 198    | 14    | 0.89%      |  |
| ciclosporin                           | 84     | 12    | 0.76%      |  | duloxetine                             | 124    | 14    | 0.89%      |  |
| azathioprine                          | 52     | 11    | 0.70%      |  | gabapentin                             | 150    | 13    | 0.83%      |  |
| losartan                              | 102    | 11    | 0.70%      |  | valsartan                              | 160    | 12    | 0.76%      |  |
| calcitriol                            | 116    | 10    | 0.64%      |  | zolpidem                               | 198    | 12    | 0.76%      |  |
| flucloxacillin                        | 58     | 10    | 0.64%      |  | citalopram                             | 138    | 12    | 0.76%      |  |
| mefenamic acid                        | 28     | 10    | 0.64%      |  | propranolol                            | 130    | 10    | 0.64%      |  |
| tiaprofenic acid                      | 34     | 9     | 0.57%      |  | bupropion                              | 44     | 10    | 0.64%      |  |
| chlorphenamine                        | 64     | 9     | 0.57%      |  | lamotrigine                            | 70     | 9     | 0.57%      |  |
| domperidone                           | 120    | 8     | 0.51%      |  | tobramycin                             | 164    | 8     | 0.51%      |  |
| exemestane                            | 42     | 8     | 0.51%      |  | aripiprazole                           | 44     | 8     | 0.51%      |  |
| denosumab                             | 74     | 8     | 0.51%      |  | nitrofurantoin                         | 102    | 7     | 0.45%      |  |



**Supplementary Table S5.** Summary of the top 20 drugs of each cluster found with the Louvain algorithm in the network analysis among ICSRs aged < 65 years old (N=1379).

| Cluster 1<br>(N <sub>drugs</sub> =61) |        |       |            | Cluster 2<br>(N <sub>drugs</sub> =93) |        |       |            | Cluster 3<br>(N <sub>drugs</sub> =57) |        |       |            |
|---------------------------------------|--------|-------|------------|---------------------------------------|--------|-------|------------|---------------------------------------|--------|-------|------------|
| Drug                                  | Degree | Count | Prevalence | Drug                                  | Degree | Count | Prevalence | Drug                                  | Degree | Count | Prevalence |
| vancomycin                            | 236    | 104   | 7.54%      | amoxicillin                           | 508    | 288   | 20.88%     | ranitidine                            | 190    | 26    | 1.89%      |
| ceftriaxone                           | 266    | 103   | 7.47%      | paracetamol                           | 610    | 232   | 16.82%     | clarithromycin                        | 132    | 23    | 1.67%      |
| clindamycin                           | 324    | 94    | 6.82%      | ibuprofen                             | 226    | 80    | 5.80%      | flucloxacillin                        | 140    | 18    | 1.31%      |
| metronidazole                         | 290    | 73    | 5.29%      | pristinamycin                         | 208    | 66    | 4.79%      | heparin                               | 226    | 18    | 1.31%      |
| piperacillin                          | 182    | 57    | 4.13%      | erythromycin                          | 80     | 20    | 1.45%      | rifampicin                            | 122    | 16    | 1.16%      |
| ciprofloxacin                         | 200    | 47    | 3.41%      | betamethasone                         | 102    | 19    | 1.38%      | hydrocortisone                        | 186    | 15    | 1.09%      |
| ampicillin                            | 80     | 33    | 2.39%      | mefenamic acid                        | 34     | 15    | 1.09%      | cefotaxime                            | 124    | 15    | 1.09%      |
| cefazolin                             | 142    | 31    | 2.25%      | chlorphenamine                        | 54     | 15    | 1.09%      | tranexamic acid                       | 174    | 15    | 1.09%      |
| meropenem                             | 148    | 31    | 2.25%      | fusidic acid                          | 98     | 12    | 0.87%      | isoniazid                             | 46     | 12    | 0.87%      |
| cloxacillin                           | 118    | 27    | 1.96%      | cefixime                              | 22     | 10    | 0.73%      | lactulose                             | 142    | 11    | 0.80%      |
| gentamicin                            | 192    | 24    | 1.74%      | tiaprofenic acid                      | 40     | 10    | 0.73%      | chlorhexidine                         | 132    | 7     | 0.51%      |
| doxycycline                           | 46     | 23    | 1.67%      | cetirizine                            | 78     | 10    | 0.73%      | minocycline                           | 28     | 7     | 0.51%      |
| benzylpenicillin                      | 70     | 19    | 1.38%      | naproxen                              | 38     | 9     | 0.65%      | pyrazinamide                          | 22     | 7     | 0.51%      |
| ceftazidime                           | 78     | 19    | 1.38%      | acetylcysteine                        | 36     | 9     | 0.65%      | ethambutol                            | 20     | 6     | 0.44%      |
| amikacin                              | 92     | 19    | 1.38%      | levocetirizine                        | 68     | 9     | 0.65%      | clotrimazole                          | 34     | 5     | 0.36%      |
| aciclovir                             | 90     | 19    | 1.38%      | cefpodoxime                           | 42     | 8     | 0.58%      | norepinephrine                        | 108    | 5     | 0.36%      |
| ofloxacin                             | 72     | 13    | 0.94%      | cefditoren                            | 14     | 8     | 0.58%      | moxifloxacin                          | 32     | 4     | 0.29%      |
| teicoplanin                           | 46     | 11    | 0.80%      | candesartan                           | 66     | 8     | 0.58%      | oseltamivir                           | 86     | 4     | 0.29%      |
| linezolid                             | 66     | 11    | 0.80%      | loratadine                            | 30     | 8     | 0.58%      | chloramphenicol                       | 82     | 4     | 0.29%      |
| cefoperazone                          | 40     | 9     | 0.65%      | piroxicam                             | 26     | 7     | 0.51%      | quetiapine                            | 102    | 4     | 0.29%      |

**Supplementary Table S5. (continued)** Summary of the top 20 drugs of each cluster found with the Louvain algorithm in the network analysis among ICSRs aged < 65 years old (N=1379).

| Cluster 4<br>(N <sub>drugs</sub> =2) |        |       |            | Cluster 5<br>(N <sub>drugs</sub> =10) |        |       |            | Cluster 6<br>(N <sub>drugs</sub> =33) |        |       |            |
|--------------------------------------|--------|-------|------------|---------------------------------------|--------|-------|------------|---------------------------------------|--------|-------|------------|
| Drug                                 | Degree | Count | Prevalence | Drug                                  | Degree | Count | Prevalence | Drug                                  | Degree | Count | Prevalence |
| cefprozil                            | 2      | 1     | 0.07%      | ritonavir                             | 26     | 5     | 0.36%      | allopurinol                           | 162    | 34    | 2.47%      |
| famciclovir                          | 2      | 1     | 0.07%      | emtricitabine                         | 24     | 5     | 0.36%      | caffeine                              | 84     | 11    | 0.80%      |
|                                      |        |       |            | cisplatin                             | 32     | 5     | 0.36%      | carbocysteine                         | 82     | 11    | 0.80%      |
|                                      |        |       |            | darunavir                             | 20     | 4     | 0.29%      | codeine                               | 118    | 11    | 0.80%      |
|                                      |        |       |            | bleomycin                             | 18     | 4     | 0.29%      | bromhexine                            | 78     | 8     | 0.58%      |
|                                      |        |       |            | etoposide                             | 16     | 2     | 0.15%      | colchicine                            | 34     | 7     | 0.51%      |
|                                      |        |       |            | cetuximab                             | 10     | 2     | 0.15%      | ambroxol                              | 76     | 7     | 0.51%      |
|                                      |        |       |            | peginterferon alfa-2a                 | 6      | 2     | 0.15%      | tipepidine                            | 38     | 5     | 0.36%      |
|                                      |        |       |            | atazanavir                            | 8      | 1     | 0.07%      | bendamustine                          | 12     | 3     | 0.22%      |
|                                      |        |       |            | capecitabine                          | 6      | 1     | 0.07%      | pemetrexed                            | 42     | 3     | 0.22%      |
|                                      |        |       |            |                                       |        |       |            | rituximab                             | 12     | 3     | 0.22%      |
|                                      |        |       |            |                                       |        |       |            | acebutolol                            | 34     | 3     | 0.22%      |
|                                      |        |       |            |                                       |        |       |            | telmisartan                           | 46     | 3     | 0.22%      |
|                                      |        |       |            |                                       |        |       |            | etizolam                              | 56     | 3     | 0.22%      |
|                                      |        |       |            |                                       |        |       |            | tulobuterol                           | 24     | 3     | 0.22%      |
|                                      |        |       |            |                                       |        |       |            | theophylline                          | 52     | 3     | 0.22%      |
|                                      |        |       |            |                                       |        |       |            | clotiazepam                           | 22     | 2     | 0.15%      |
|                                      |        |       |            |                                       |        |       |            | palonosetron                          | 34     | 1     | 0.07%      |
|                                      |        |       |            |                                       |        |       |            | potassium citrate                     | 34     | 1     | 0.07%      |
|                                      |        |       |            |                                       |        |       |            | cefozopran                            | 4      | 1     | 0.07%      |

**Supplementary Table S5. (continued)** Summary of the top 20 drugs of each cluster found with the Louvain algorithm in the network analysis among ICSRs aged < 65 years old (N=1379).

| Cluster 7<br>(N <sub>drugs</sub> =2) |        |       |            | Cluster 8<br>(N <sub>drugs</sub> =49) |        |       |            | Cluster 9<br>(N <sub>drugs</sub> =82) |        |       |            |
|--------------------------------------|--------|-------|------------|---------------------------------------|--------|-------|------------|---------------------------------------|--------|-------|------------|
| Drug                                 | Degree | Count | Prevalence | Drug                                  | Degree | Count | Prevalence | Drug                                  | Degree | Count | Prevalence |
| triptorelin                          | 2      | 1     | 0.07%      | sulfamethoxazole                      | 162    | 47    | 3.41%      | esomeprazole                          | 328    | 51    | 3.70%      |
| exemestane                           | 2      | 1     | 0.07%      | valaciclovir                          | 122    | 21    | 1.52%      | enoxaparin                            | 248    | 46    | 3.34%      |
|                                      |        |       |            | fluconazole                           | 120    | 20    | 1.45%      | tramadol                              | 256    | 44    | 3.19%      |
|                                      |        |       |            | levofloxacin                          | 108    | 18    | 1.31%      | diclofenac                            | 198    | 43    | 3.12%      |
|                                      |        |       |            | cefepime                              | 68     | 14    | 1.02%      | dexamethasone                         | 226    | 32    | 2.32%      |
|                                      |        |       |            | ciclosporin                           | 104    | 13    | 0.94%      | ondansetron                           | 202    | 22    | 1.60%      |
|                                      |        |       |            | amiodarone                            | 52     | 10    | 0.73%      | propofol                              | 208    | 22    | 1.60%      |
|                                      |        |       |            | mupirocin                             | 16     | 10    | 0.73%      | cefuroxime                            | 144    | 21    | 1.52%      |
|                                      |        |       |            | fluindione                            | 46     | 7     | 0.51%      | ketoprofen                            | 116    | 21    | 1.52%      |
|                                      |        |       |            | temozolomide                          | 12     | 6     | 0.44%      | hydroxyzine                           | 154    | 21    | 1.52%      |
|                                      |        |       |            | lamivudine                            | 20     | 5     | 0.36%      | nefopam                               | 162    | 20    | 1.45%      |
|                                      |        |       |            | mycophenolic acid                     | 40     | 5     | 0.36%      | metoclopramide                        | 172    | 18    | 1.31%      |
|                                      |        |       |            | nystatin                              | 36     | 4     | 0.29%      | morphine                              | 168    | 17    | 1.23%      |
|                                      |        |       |            | racecadotril                          | 36     | 4     | 0.29%      | phloroglucinol                        | 92     | 13    | 0.94%      |
|                                      |        |       |            | ursodeoxycholic acid                  | 20     | 3     | 0.22%      | sufentanil                            | 88     | 12    | 0.87%      |
|                                      |        |       |            | rifaximin                             | 12     | 3     | 0.22%      | lidocaine                             | 126    | 11    | 0.80%      |
|                                      |        |       |            | diosmectite                           | 26     | 3     | 0.22%      | fentanyl                              | 208    | 11    | 0.80%      |
|                                      |        |       |            | nevirapine                            | 6      | 3     | 0.22%      | midazolam                             | 150    | 10    | 0.73%      |
|                                      |        |       |            | gemcitabine                           | 16     | 3     | 0.22%      | diphenhydramine                       | 114    | 9     | 0.65%      |
|                                      |        |       |            | doxorubicin                           | 24     | 3     | 0.22%      | rivaroxaban                           | 42     | 7     | 0.51%      |

**Supplementary Table S5. (continued)** Summary of the top 20 drugs of each cluster found with the Louvain algorithm in the network analysis among ICSRs aged < 65 years old (N=1379).

| Cluster 10<br>(N <sub>drugs</sub> =117) |        |       |            |  | Cluster 11<br>(N <sub>drugs</sub> =46) |        |       |            |  |
|-----------------------------------------|--------|-------|------------|--|----------------------------------------|--------|-------|------------|--|
| Drug                                    | Degree | Count | Prevalence |  | Drug                                   | Degree | Count | Prevalence |  |
| omeprazole                              | 368    | 55    | 3.99%      |  | levetiracetam                          | 176    | 22    | 1.60%      |  |
| acetylsalicylic acid                    | 280    | 50    | 3.63%      |  | valproic acid                          | 130    | 21    | 1.52%      |  |
| furosemide                              | 262    | 47    | 3.41%      |  | phenytoin                              | 50     | 18    | 1.31%      |  |
| metformin                               | 258    | 43    | 3.12%      |  | carbamazepine                          | 68     | 17    | 1.23%      |  |
| amlodipine                              | 196    | 31    | 2.25%      |  | lorazepam                              | 132    | 14    | 1.02%      |  |
| atorvastatin                            | 242    | 27    | 1.96%      |  | ascorbic acid                          | 66     | 13    | 0.94%      |  |
| diltiazem                               | 152    | 25    | 1.81%      |  | lamotrigine                            | 114    | 13    | 0.94%      |  |
| bisoprolol                              | 152    | 24    | 1.74%      |  | iomeprol                               | 58     | 11    | 0.80%      |  |
| simvastatin                             | 176    | 24    | 1.74%      |  | bupropion                              | 50     | 10    | 0.73%      |  |
| hydrochlorothiazide                     | 150    | 18    | 1.31%      |  | duloxetine                             | 80     | 10    | 0.73%      |  |
| perindopril                             | 150    | 15    | 1.09%      |  | iodixanol                              | 40     | 10    | 0.73%      |  |
| ramipril                                | 86     | 13    | 0.94%      |  | famotidine                             | 82     | 9     | 0.65%      |  |
| clopidogrel                             | 136    | 12    | 0.87%      |  | aripiprazole                           | 40     | 8     | 0.58%      |  |
| enalapril                               | 76     | 12    | 0.87%      |  | clonazepam                             | 40     | 6     | 0.44%      |  |
| zopiclone                               | 144    | 12    | 0.87%      |  | phenobarbital                          | 32     | 5     | 0.36%      |  |
| itraconazole                            | 32     | 10    | 0.73%      |  | cyanocobalamin                         | 38     | 4     | 0.29%      |  |
| salbutamol                              | 102    | 10    | 0.73%      |  | dapsone                                | 20     | 4     | 0.29%      |  |
| spironolactone                          | 72     | 9     | 0.65%      |  | glucosamine                            | 22     | 4     | 0.29%      |  |
| fluticasone                             | 116    | 9     | 0.65%      |  | lithium                                | 34     | 4     | 0.29%      |  |
| olanzapine                              | 60     | 9     | 0.65%      |  | clobazam                               | 60     | 4     | 0.29%      |  |

**Supplementary Table S5. (continued)** Summary of the top 20 drugs of each cluster found with the Louvain algorithm in the network analysis among ICSRs aged < 65 years old (N=1379).

| Cluster 12<br>(N <sub>drugs</sub> =47) |        |       |            | Cluster 13<br>(N <sub>drugs</sub> =101) |        |       |            |
|----------------------------------------|--------|-------|------------|-----------------------------------------|--------|-------|------------|
| Drug                                   | Degree | Count | Prevalence | Drug                                    | Degree | Count | Prevalence |
| cefalexin                              | 104    | 15    | 1.09%      | prednisolone                            | 260    | 78    | 5.66%      |
| desloratadine                          | 170    | 13    | 0.94%      | hydroxychloroquine                      | 170    | 62    | 4.50%      |
| gabapentin                             | 140    | 12    | 0.87%      | pantoprazole                            | 268    | 48    | 3.48%      |
| fluoxetine                             | 116    | 11    | 0.80%      | prednisone                              | 216    | 48    | 3.48%      |
| rosuvastatin                           | 110    | 10    | 0.73%      | terbinafine                             | 152    | 47    | 3.41%      |
| propranolol                            | 88     | 9     | 0.65%      | methylprednisolone                      | 160    | 34    | 2.47%      |
| iohexol                                | 60     | 8     | 0.58%      | methotrexate                            | 140    | 32    | 2.32%      |
| metoprolol                             | 86     | 7     | 0.51%      | calcium carbonate                       | 196    | 23    | 1.67%      |
| ketoconazole                           | 82     | 7     | 0.51%      | folic acid                              | 176    | 23    | 1.67%      |
| ethinylestradiol                       | 26     | 7     | 0.51%      | azathioprine                            | 72     | 19    | 1.38%      |
| citalopram                             | 108    | 6     | 0.44%      | azithromycin                            | 60     | 17    | 1.23%      |
| risperidone                            | 54     | 5     | 0.36%      | alprazolam                              | 168    | 15    | 1.09%      |
| zolpidem                               | 102    | 5     | 0.36%      | atenolol                                | 116    | 14    | 1.02%      |
| sertraline                             | 70     | 5     | 0.36%      | pregabalin                              | 138    | 14    | 1.02%      |
| valsartan                              | 62     | 4     | 0.29%      | celecoxib                               | 90     | 12    | 0.87%      |
| mometasone                             | 56     | 4     | 0.29%      | lansoprazole                            | 78     | 11    | 0.80%      |
| bromazepam                             | 62     | 4     | 0.29%      | domperidone                             | 114    | 11    | 0.80%      |
| magnesium oxide                        | 40     | 3     | 0.22%      | alendronic acid                         | 84     | 10    | 0.73%      |
| cefaclor                               | 6      | 3     | 0.22%      | oxycodone                               | 104    | 10    | 0.73%      |
| tobramycin                             | 92     | 3     | 0.22%      | fexofenadine                            | 64     | 10    | 0.73%      |

**Supplementary Table S6.** Summary of the top 20 drugs of each cluster found with the Louvain algorithm in the network analysis for  $\geq 65$  years old (N=1043).

| Cluster 1<br>(N <sub>drugs</sub> =120) |        |       |            | Cluster 2<br>(N <sub>drugs</sub> =152) |        |       |            | Cluster 3<br>(N <sub>drugs</sub> =68) |        |       |            |
|----------------------------------------|--------|-------|------------|----------------------------------------|--------|-------|------------|---------------------------------------|--------|-------|------------|
| Drug                                   | Degree | Count | Prevalence | Drug                                   | Degree | Count | Prevalence | Drug                                  | Degree | Count | Prevalence |
| amoxicillin                            | 536    | 229   | 21.96%     | acetylsalicylic acid                   | 554    | 120   | 11.51%     | valproic acid                         | 136    | 41    | 3.93%      |
| furosemide                             | 590    | 130   | 12.46%     | amlodipine                             | 416    | 79    | 7.57%      | levetiracetam                         | 126    | 41    | 3.93%      |
| bisoprolol                             | 416    | 79    | 7.57%      | atorvastatin                           | 378    | 61    | 5.85%      | lansoprazole                          | 222    | 30    | 2.88%      |
| esomeprazole                           | 392    | 58    | 5.56%      | metformin                              | 320    | 45    | 4.31%      | betamethasone                         | 208    | 22    | 2.11%      |
| allopurinol                            | 360    | 54    | 5.18%      | terbinafine                            | 186    | 34    | 3.26%      | diclofenac                            | 138    | 19    | 1.82%      |
| pristinamycin                          | 234    | 48    | 4.60%      | clopidogrel                            | 264    | 33    | 3.16%      | tamsulosin                            | 194    | 16    | 1.53%      |
| ramipril                               | 292    | 41    | 3.93%      | hydrochlorothiazide                    | 218    | 33    | 3.16%      | methylprednisolone                    | 132    | 15    | 1.44%      |
| fluindione                             | 182    | 30    | 2.88%      | diltiazem                              | 220    | 33    | 3.16%      | hydrocortisone                        | 146    | 12    | 1.15%      |
| warfarin                               | 232    | 28    | 2.68%      | metoprolol                             | 200    | 23    | 2.21%      | famotidine                            | 130    | 12    | 1.15%      |
| candesartan                            | 186    | 21    | 2.01%      | pregabalin                             | 260    | 23    | 2.21%      | magnesium oxide                       | 158    | 11    | 1.05%      |
| spironolactone                         | 202    | 20    | 1.92%      | cefazolin                              | 174    | 22    | 2.11%      | carbocisteine                         | 128    | 11    | 1.05%      |
| clarithromycin                         | 116    | 19    | 1.82%      | glyceryl trinitrate                    | 238    | 22    | 2.11%      | ascorbic acid                         | 126    | 9     | 0.86%      |
| oxazepam                               | 208    | 19    | 1.82%      | rosuvastatin                           | 168    | 20    | 1.92%      | nifedipine                            | 72     | 8     | 0.77%      |
| zopiclone                              | 194    | 19    | 1.82%      | fluticasone                            | 196    | 17    | 1.63%      | fentanyl                              | 92     | 8     | 0.77%      |
| pravastatin                            | 150    | 17    | 1.63%      | gliclazide                             | 154    | 16    | 1.53%      | carbamazepine                         | 80     | 8     | 0.77%      |
| digoxin                                | 156    | 16    | 1.53%      | sitagliptin                            | 188    | 16    | 1.53%      | phenytoin                             | 38     | 7     | 0.67%      |
| torasemide                             | 180    | 16    | 1.53%      | lisinopril                             | 116    | 16    | 1.53%      | donepezil                             | 82     | 7     | 0.67%      |
| insulin glargine                       | 184    | 15    | 1.44%      | valsartan                              | 154    | 16    | 1.53%      | propranolol                           | 70     | 5     | 0.48%      |
| cetirizine                             | 200    | 15    | 1.44%      | atenolol                               | 114    | 15    | 1.44%      | finasteride                           | 50     | 5     | 0.48%      |
| verapamil                              | 112    | 14    | 1.34%      | escitalopram                           | 132    | 14    | 1.34%      | ursodeoxycholic acid                  | 48     | 4     | 0.38%      |

**Supplementary Table S6. (continued)** Summary of the top 20 drugs of each cluster found with the Louvain algorithm in the network analysis for  $\geq 65$  years old (N=1043).

| Cluster 4<br>(N <sub>drugs</sub> =2) |        |       |            | Cluster 5<br>(N <sub>drugs</sub> =37) |        |       |            | Cluster 6<br>(N <sub>drugs</sub> =51) |        |       |            |
|--------------------------------------|--------|-------|------------|---------------------------------------|--------|-------|------------|---------------------------------------|--------|-------|------------|
| Drug                                 | Degree | Count | Prevalence | Drug                                  | Degree | Count | Prevalence | Drug                                  | Degree | Count | Prevalence |
| emtricitabine                        | 6      | 1     | 0.10%      | paracetamol                           | 584    | 129   | 12.37%     | hydroxychloroquine                    | 150    | 29    | 2.78%      |
| efavirenz                            | 6      | 1     | 0.10%      | omeprazole                            | 410    | 71    | 6.81%      | folic acid                            | 278    | 29    | 2.78%      |
|                                      |        |       |            | pantoprazole                          | 416    | 65    | 6.23%      | prednisone                            | 192    | 25    | 2.40%      |
|                                      |        |       |            | enoxaparin                            | 338    | 58    | 5.56%      | colecalfiferol                        | 232    | 19    | 1.82%      |
|                                      |        |       |            | fluconazole                           | 188    | 30    | 2.88%      | methotrexate                          | 94     | 14    | 1.34%      |
|                                      |        |       |            | alprazolam                            | 296    | 26    | 2.49%      | apixaban                              | 172    | 14    | 1.34%      |
|                                      |        |       |            | heparin                               | 236    | 25    | 2.40%      | aciclovir                             | 108    | 13    | 1.25%      |
|                                      |        |       |            | dexamethasone                         | 172    | 23    | 2.21%      | lorazepam                             | 154    | 13    | 1.25%      |
|                                      |        |       |            | cefepime                              | 130    | 22    | 2.11%      | mirtazapine                           | 102    | 10    | 0.96%      |
|                                      |        |       |            | amiodarone                            | 198    | 20    | 1.92%      | venlafaxine                           | 114    | 10    | 0.96%      |
|                                      |        |       |            | meropenem                             | 180    | 17    | 1.63%      | isoniazid                             | 58     | 7     | 0.67%      |
|                                      |        |       |            | ranitidine                            | 174    | 16    | 1.53%      | telmisartan                           | 62     | 5     | 0.48%      |
|                                      |        |       |            | morphine                              | 156    | 13    | 1.25%      | denosumab                             | 48     | 5     | 0.48%      |
|                                      |        |       |            | zolpidem                              | 176    | 12    | 1.15%      | cefdinir                              | 24     | 4     | 0.38%      |
|                                      |        |       |            | lidocaine                             | 118    | 9     | 0.86%      | ritonavir                             | 48     | 4     | 0.38%      |
|                                      |        |       |            | daptomycin                            | 96     | 8     | 0.77%      | darunavir                             | 48     | 4     | 0.38%      |
|                                      |        |       |            | diphenhydramine                       | 70     | 8     | 0.77%      | sotalol                               | 50     | 4     | 0.38%      |
|                                      |        |       |            | metoclopramide                        | 66     | 7     | 0.67%      | levocetirizine                        | 54     | 4     | 0.38%      |
|                                      |        |       |            | promethazine                          | 92     | 7     | 0.67%      | bilastine                             | 60     | 4     | 0.38%      |
|                                      |        |       |            | meloxicam                             | 62     | 7     | 0.67%      | triamcinolone                         | 24     | 3     | 0.29%      |

**Supplementary Table S6. (continued)** Summary of the top 20 drugs of each cluster found with the Louvain algorithm in the network analysis for  $\geq 65$  years old (N=1043).

| Cluster 7<br>(N <sub>drugs</sub> =3) |        |       |            | Cluster 8<br>(N <sub>drugs</sub> =86) |        |       |            | Cluster 9<br>(N <sub>drugs</sub> =88) |        |       |            |
|--------------------------------------|--------|-------|------------|---------------------------------------|--------|-------|------------|---------------------------------------|--------|-------|------------|
| Drug                                 | Degree | Count | Prevalence | Drug                                  | Degree | Count | Prevalence | Drug                                  | Degree | Count | Prevalence |
| ivermectin                           | 4      | 1     | 0.10%      | simvastatin                           | 318    | 39    | 3.74%      | ceftriaxone                           | 324    | 109   | 10.45%     |
| benzyl benzoate                      | 4      | 1     | 0.10%      | prednisolone                          | 260    | 36    | 3.45%      | vancomycin                            | 266    | 97    | 9.30%      |
| darbepoetin alfa                     | 4      | 1     | 0.10%      | calcium carbonate                     | 300    | 33    | 3.16%      | piperacillin                          | 304    | 79    | 7.57%      |
|                                      |        |       |            | salbutamol                            | 256    | 28    | 2.68%      | clindamycin                           | 232    | 69    | 6.62%      |
|                                      |        |       |            | budesonide                            | 230    | 22    | 2.11%      | ciprofloxacin                         | 204    | 63    | 6.04%      |
|                                      |        |       |            | lercanidipine                         | 152    | 16    | 1.53%      | metronidazole                         | 252    | 61    | 5.85%      |
|                                      |        |       |            | enalapril                             | 128    | 16    | 1.53%      | levofloxacin                          | 242    | 50    | 4.79%      |
|                                      |        |       |            | ibuprofen                             | 136    | 15    | 1.44%      | sulfamethoxazole                      | 264    | 44    | 4.22%      |
|                                      |        |       |            | alendronic acid                       | 136    | 14    | 1.34%      | tramadol                              | 218    | 39    | 3.74%      |
|                                      |        |       |            | hydroxyzine                           | 122    | 13    | 1.25%      | azithromycin                          | 144    | 27    | 2.59%      |
|                                      |        |       |            | codeine                               | 150    | 13    | 1.25%      | ofloxacin                             | 142    | 25    | 2.40%      |
|                                      |        |       |            | iodixanol                             | 98     | 12    | 1.15%      | ampicillin                            | 102    | 17    | 1.63%      |
|                                      |        |       |            | iomeprol                              | 90     | 12    | 1.15%      | teicoplanin                           | 108    | 16    | 1.53%      |
|                                      |        |       |            | nicardipine                           | 118    | 10    | 0.96%      | rifampicin                            | 70     | 16    | 1.53%      |
|                                      |        |       |            | ketoprofen                            | 86     | 10    | 0.96%      | spiramycin                            | 64     | 14    | 1.34%      |
|                                      |        |       |            | gabapentin                            | 62     | 10    | 0.96%      | gentamicin                            | 124    | 14    | 1.34%      |
|                                      |        |       |            | montelukast                           | 116    | 9     | 0.86%      | cloxacillin                           | 80     | 13    | 1.25%      |
|                                      |        |       |            | citalopram                            | 76     | 8     | 0.77%      | cefotaxime                            | 78     | 10    | 0.96%      |
|                                      |        |       |            | flucloxacillin                        | 52     | 7     | 0.67%      | linezolid                             | 54     | 10    | 0.96%      |
|                                      |        |       |            | cyanocobalamin                        | 114    | 7     | 0.67%      | amikacin                              | 86     | 10    | 0.96%      |



**Supplementary Table S7.** Summary of the top 20 drugs of each cluster found by using the leading eigenvector clustering to the network analysis (N=2649).

| Cluster 1<br>(N <sub>drugs</sub> =412) |        |       |            | Cluster 2<br>(N <sub>drugs</sub> =2) |        |       |            |
|----------------------------------------|--------|-------|------------|--------------------------------------|--------|-------|------------|
| Drug                                   | Degree | Count | Prevalence | Drug                                 | Degree | Count | Prevalence |
| paracetamol                            | 916    | 397   | 14.99%     | cefprozil                            | 2      | 1     | 0.04%      |
| ceftriaxone                            | 472    | 234   | 8.83%      | famciclovir                          | 2      | 1     | 0.04%      |
| vancomycin                             | 392    | 219   | 8.27%      |                                      |        |       |            |
| clindamycin                            | 468    | 181   | 6.83%      |                                      |        |       |            |
| piperacillin                           | 428    | 157   | 5.93%      |                                      |        |       |            |
| metronidazole                          | 448    | 150   | 5.66%      |                                      |        |       |            |
| omeprazole                             | 614    | 137   | 5.17%      |                                      |        |       |            |
| enoxaparin                             | 484    | 118   | 4.45%      |                                      |        |       |            |
| esomeprazole                           | 566    | 116   | 4.38%      |                                      |        |       |            |
| ciprofloxacin                          | 358    | 116   | 4.38%      |                                      |        |       |            |
| sulfamethoxazole                       | 422    | 106   | 4.00%      |                                      |        |       |            |
| ibuprofen                              | 324    | 102   | 3.85%      |                                      |        |       |            |
| tramadol                               | 380    | 93    | 3.51%      |                                      |        |       |            |
| levofloxacin                           | 300    | 72    | 2.72%      |                                      |        |       |            |
| levetiracetam                          | 270    | 71    | 2.68%      |                                      |        |       |            |
| valproic acid                          | 254    | 67    | 2.53%      |                                      |        |       |            |
| diclofenac                             | 296    | 64    | 2.42%      |                                      |        |       |            |
| dexamethasone                          | 366    | 61    | 2.30%      |                                      |        |       |            |
| cefazolin                              | 282    | 60    | 2.27%      |                                      |        |       |            |
| fluconazole                            | 308    | 58    | 2.19%      |                                      |        |       |            |

**Supplementary Table S7. (continued)** Summary of the top 20 drugs of each cluster found by using the leading eigenvector clustering to the network analysis (N=2649).

| Cluster 3<br>(N <sub>drugs</sub> =273) |        |       |            | Cluster 4<br>(N <sub>drugs</sub> =181) |        |       |            |
|----------------------------------------|--------|-------|------------|----------------------------------------|--------|-------|------------|
| Drug                                   | Degree | Count | Prevalence | Drug                                   | Degree | Count | Prevalence |
| amoxicillin                            | 786    | 573   | 21.63%     | prednisolone                           | 432    | 120   | 4.53%      |
| furosemide                             | 688    | 197   | 7.44%      | hydroxychloroquine                     | 286    | 98    | 3.70%      |
| acetylsalicylic acid                   | 692    | 189   | 7.13%      | prednisone                             | 356    | 76    | 2.87%      |
| amlodipine                             | 534    | 126   | 4.76%      | calcium carbonate                      | 472    | 62    | 2.34%      |
| pristinamycin                          | 370    | 124   | 4.68%      | folic acid                             | 404    | 61    | 2.30%      |
| pantoprazole                           | 538    | 121   | 4.57%      | methotrexate                           | 222    | 50    | 1.89%      |
| bisoprolol                             | 466    | 108   | 4.08%      | alprazolam                             | 398    | 46    | 1.74%      |
| atorvastatin                           | 498    | 99    | 3.74%      | pregabalin                             | 358    | 44    | 1.66%      |
| metformin                              | 464    | 92    | 3.47%      | metoprolol                             | 278    | 33    | 1.25%      |
| allopurinol                            | 450    | 92    | 3.47%      | iomeprol                               | 146    | 30    | 1.13%      |
| terbinafine                            | 294    | 87    | 3.28%      | oxycodone                              | 294    | 28    | 1.06%      |
| simvastatin                            | 406    | 65    | 2.45%      | lorazepam                              | 262    | 28    | 1.06%      |
| diltiazem                              | 306    | 62    | 2.34%      | colecalfiferol                         | 302    | 27    | 1.02%      |
| hydrochlorothiazide                    | 354    | 59    | 2.23%      | gabapentin                             | 222    | 27    | 1.02%      |
| ramipril                               | 324    | 58    | 2.19%      | budesonide                             | 276    | 26    | 0.98%      |
| lansoprazole                           | 328    | 53    | 2.00%      | alendronic acid                        | 186    | 25    | 0.94%      |
| clopidogrel                            | 330    | 47    | 1.77%      | ascorbic acid                          | 232    | 24    | 0.91%      |
| betamethasone                          | 280    | 45    | 1.70%      | azathioprine                           | 80     | 23    | 0.87%      |
| salbutamol                             | 338    | 42    | 1.59%      | naproxen                               | 120    | 23    | 0.87%      |
| fluindione                             | 208    | 38    | 1.43%      | glyceryl trinitrate                    | 238    | 22    | 0.83%      |
